# Supplementary material
Source: PubMed Central journal article supplement (PMC8792358)
Supplement: NIHMS1760537-supplement-Supplemental_Publication_Material.pdf [file NIHMS1760537-supplement-Supplemental_Publication_Material.pdf]

## **SUPPLEMENTAL MATERIAL**

### **Ischemic-trained monocytes improve arteriogenesis in a mouse model of hindlimb ischemia**

Gustavo Falero-Diaz, PhD<sup>1\*</sup>; Catarina de A. Barboza, PhD<sup>2\*</sup>, PhD<sup>\*</sup>; Felipe Pires<sup>1</sup>, BA; Maeva Fanchin, MA<sup>1</sup>; Jingjing Ling, PhD<sup>1</sup>; Zachary M. Zigmund, PhD<sup>1</sup>; Anthony J Griswold, PhD<sup>3</sup>; Laisel Martinez, PharmD<sup>1</sup>; Roberto I. Vazquez-Padron, PhD<sup>1</sup>; Omaida C. Velazquez, MD<sup>1</sup>; Roberta M. Lassance-Soares, PhD<sup>1</sup>

<sup>1</sup>DeWitt Daughtry Family Department of Surgery, Leonard M. Miller School of Medicine, University of Miami, Miami, FL.

<sup>2</sup>Department of Adapted Physical Activity, School of Physical Education (FEF), University of Campinas (Unicamp), Campinas, SP, Brazil.

<sup>3</sup>John P. Hussman Institute for Human Genomics, Leonard M. Miller School of Medicine, University of Miami, Miami, FL

## **Supplemental Materials and Methods**

### **Mouse study design**

Male and female C57Bl/6J wild type (stock No: 000664) and C57Bl/6 tomato (mT/mG, mTmG stock No: 007676) mice were obtained from the Jackson Laboratory. In our animal facility, animals were housed in collective cages, with temperature and humidity-controlled, on a 12h light - dark cycle, allowed *ad libitum* access to standard laboratory diet and water.

### **Flow Cytometry Analysis**

The sub-population of injected BM-Mono mice were analyzed by flow cytometry. Briefly, one million cells were stained with PerCP anti-mouse/human CD11b Antibody (cat no. 101230) and APC anti-mouse Ly-6C Antibody, (cat. no. 128016), both from BioLegend. BM-Mono were incubated with antibodies diluted 1/100 in FACS buffer (5% fetal bovine serum, 1mM EDTA, 0.1% sodium azide in phosphate-buffered saline) for 45 min on ice in the dark, then washed once, and fixed in FACS buffer plus 1% paraformaldehyde. Fixable Viability Dye eFluor 520 was used to irreversibly label dead cells prior to analysis. Labeled cells were analyzed using the BD LSRII from BD Biosciences. The LSRII is equipped with 4 lasers and 15 detectors and runs the FACS Diva v.8 acquisition software.

### **Circulating Cytokines and Chemokines**

Circulating levels of cytokines/chemokines were evaluated in 24h trained and sham donor mice. Blood was extracted by cardiac puncture in anesthetized mice and collected in heparin vials. Samples were centrifuged at room temperature (15 minutes at 2,500 rpm), then the plasma was transferred into a clean vial, properly labeled, and stored at -80°C until used. Cytokine and chemokine levels in the plasma were analyzed using a Mouse Cytokine Discovery Assay (Eve Technologies, Calgary, AB Canada).

### **Gene Expression of Circulating GLUT-1 in Erythrocytes**

Circulating levels of GLUT-1 were assessed in 24h trained, 24h ischemia, and sham donor mice. A cardiac puncture was performed in anesthetized mice and blood was collected in heparin vials. Blood was centrifuged at room temperature for 15 minutes at 2,500 rpm. The plasma was removed, and the erythrocytes were washed three times with PBS and stored in RNA at -80°C until used. RNA extraction, cDNA, and qRT-PCR were performed as described in the methods session of this manuscript.

### **Tomato Cell Tracing in Hindlimb Muscle after Adoptive Transfer**

Recipient mice were subjected to hindlimb ischemia one day prior to the BM-Mono adoptive transfer from tomato donor mice (24h trained and sham). Recipients were euthanized 24h after the adoptive transfer was performed (via tail injection), and the calf muscle was harvested. Calf samples were then fixed in 0.5% paraformaldehyde, 1% glutaraldehyde, and 20% sucrose in 100-mM sodium phosphate buffer (pH 7.4) for 24h and transferred to 20% sucrose for 24h. Tissues were embedded and frozen in OCT cutting compound, cut into 5- $\mu$ m frozen sections, and then

DAPI staining was performed. Briefly, slides were heat at 37°C for 30 min and then put in cool acetone for 10 min. After that, they were removed from acetone, let dry for 10 min, and then rinsed three times with PBS. Slides were incubated with DAPI solution (1µg/ml) for 5 min. After being rinsing three times with PBS, the slides were mounted with polyvinyl alcohol mounting medium (Sigma, cat. 10981). Tissue sections were examined with a fluorescence microscope Olympus IX71 (Olympus America, Melville, NY). Data were captured and processed using the cellSens Standard Imaging Software v. 1.9 (Olympus Corporation).

### **Lipid Profile of Isolated BM-Mono**

Isolated BM-Mono from sham and 24h trained group were rinsed 3 times with PBS. After the adjustment of million cells per 100µl, they were instantly frozen and stored at -80oC until analysis. Liquid chromatography-mass spectrometry platform was used to detect and quantify the sterol lipids present in the samples. The analysis was performed by Creative Proteomic using pmol/million cells.

### Major Resources Table – Supplemental

In order to allow validation and replication of experiments, all essential research materials listed in the Methods should be included in the Major Resources Table below. Authors are encouraged to use public repositories for protocols, data, code, and other materials and provide persistent identifiers and/or links to repositories when available. Authors may add or delete rows as needed.

#### Animals (in vivo studies)

| Species | Vendor or Source       | Background Strain | Sex  | Persistent ID / URL                                                               |
|---------|------------------------|-------------------|------|-----------------------------------------------------------------------------------|
| Mouse   | The Jackson Laboratory | C57Bl6J           | both | <a href="https://www.jax.org/strain/000664">https://www.jax.org/strain/000664</a> |

#### Genetically Modified Animals

|                 | Species | Vendor or Source       | Background Strain | Other Information | Persistent ID / URL                                                               |
|-----------------|---------|------------------------|-------------------|-------------------|-----------------------------------------------------------------------------------|
| Parent - Male   | mouse   | The Jackson Laboratory | C57Bl6J           | mT/mG , mTmG      | <a href="https://www.jax.org/strain/007676">https://www.jax.org/strain/007676</a> |
| Parent - Female | mouse   | The Jackson Laboratory | C57Bl6J           | mT/mG , mTmG      | <a href="https://www.jax.org/strain/007676">https://www.jax.org/strain/007676</a> |

#### Antibodies

| Target antigen | Vendor or Source | Catalog # | Working concentration | Lot # (preferred but not required) | Persistent ID / URL                                                                                                                                                                                                                                                                             |
|----------------|------------------|-----------|-----------------------|------------------------------------|-------------------------------------------------------------------------------------------------------------------------------------------------------------------------------------------------------------------------------------------------------------------------------------------------|
| Cd11-b         | BioLegend        | 101230    | 1/100                 |                                    | <a href="https://www.biolegend.com/en-us/products/percp-anti-mouse-human-cd11b-antibody-4315?GroupID=BLG10427">https://www.biolegend.com/en-us/products/percp-anti-mouse-human-cd11b-antibody-4315?GroupID=BLG10427</a>                                                                         |
| Ly6C           | BioLegend        | 128015    | 1/100                 |                                    | <a href="https://www.biolegend.com/en-us/products/apc-anti-mouse-ly-6c-antibody-6047?GroupID=BLG7242">https://www.biolegend.com/en-us/products/apc-anti-mouse-ly-6c-antibody-6047?GroupID=BLG7242</a>                                                                                           |
| SMA            | Aligent-DaKo`    | M0851     | 1/200                 |                                    | <a href="https://www.agilent.com/en/product/immunohistochemistry/antibodies-controls/primary-antibodies/actin-(smooth-muscle)-(concentrate)-76542">https://www.agilent.com/en/product/immunohistochemistry/antibodies-controls/primary-antibodies/actin-(smooth-muscle)-(concentrate)-76542</a> |

#### Cultured Cells

| Name               | Vendor or Source | Sex (F, M, or unknown) | Persistent ID / URL |
|--------------------|------------------|------------------------|---------------------|
| Mouse BM-monocytes | Primary culture  | Both sex C57Bl6J       |                     |

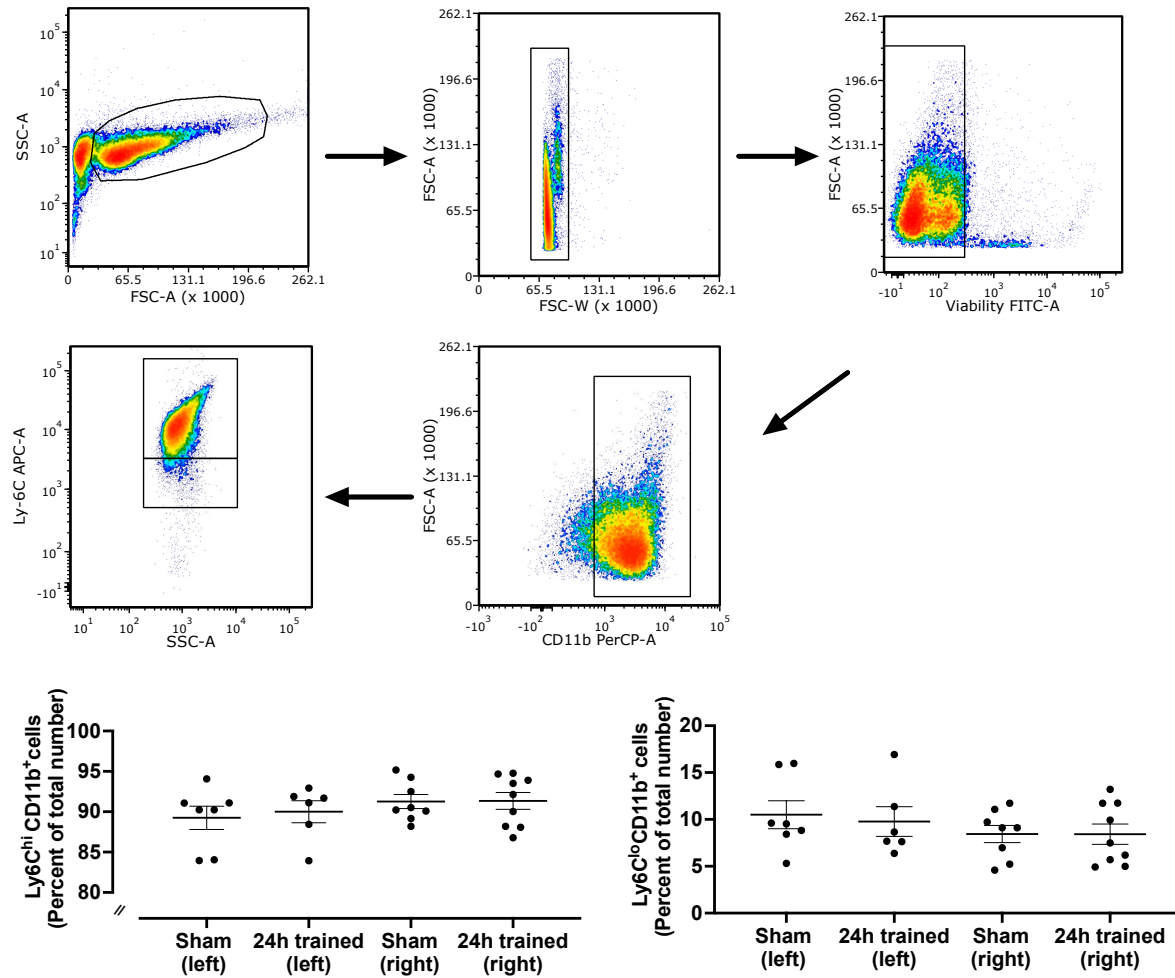

**Figure S1. Flow cytometry analysis of isolated BM-Mono.** Isolated BM-Mono from right (non-ischemic) and left (ischemic) legs of 24h trained and sham donors were analyzed for Ly6C<sup>hi</sup>CD11b<sup>+</sup> (inflammatory monocytes) and Ly6C<sup>lo</sup>CD11b<sup>+</sup> (patrollers monocytes) markers. There was no difference in the percentage of inflammatory vs. patrollers monocytes between the groups. Data were compared to sham (left) using Brown-Forsythe ANOVA test with Dunnett's multiple comparisons test.

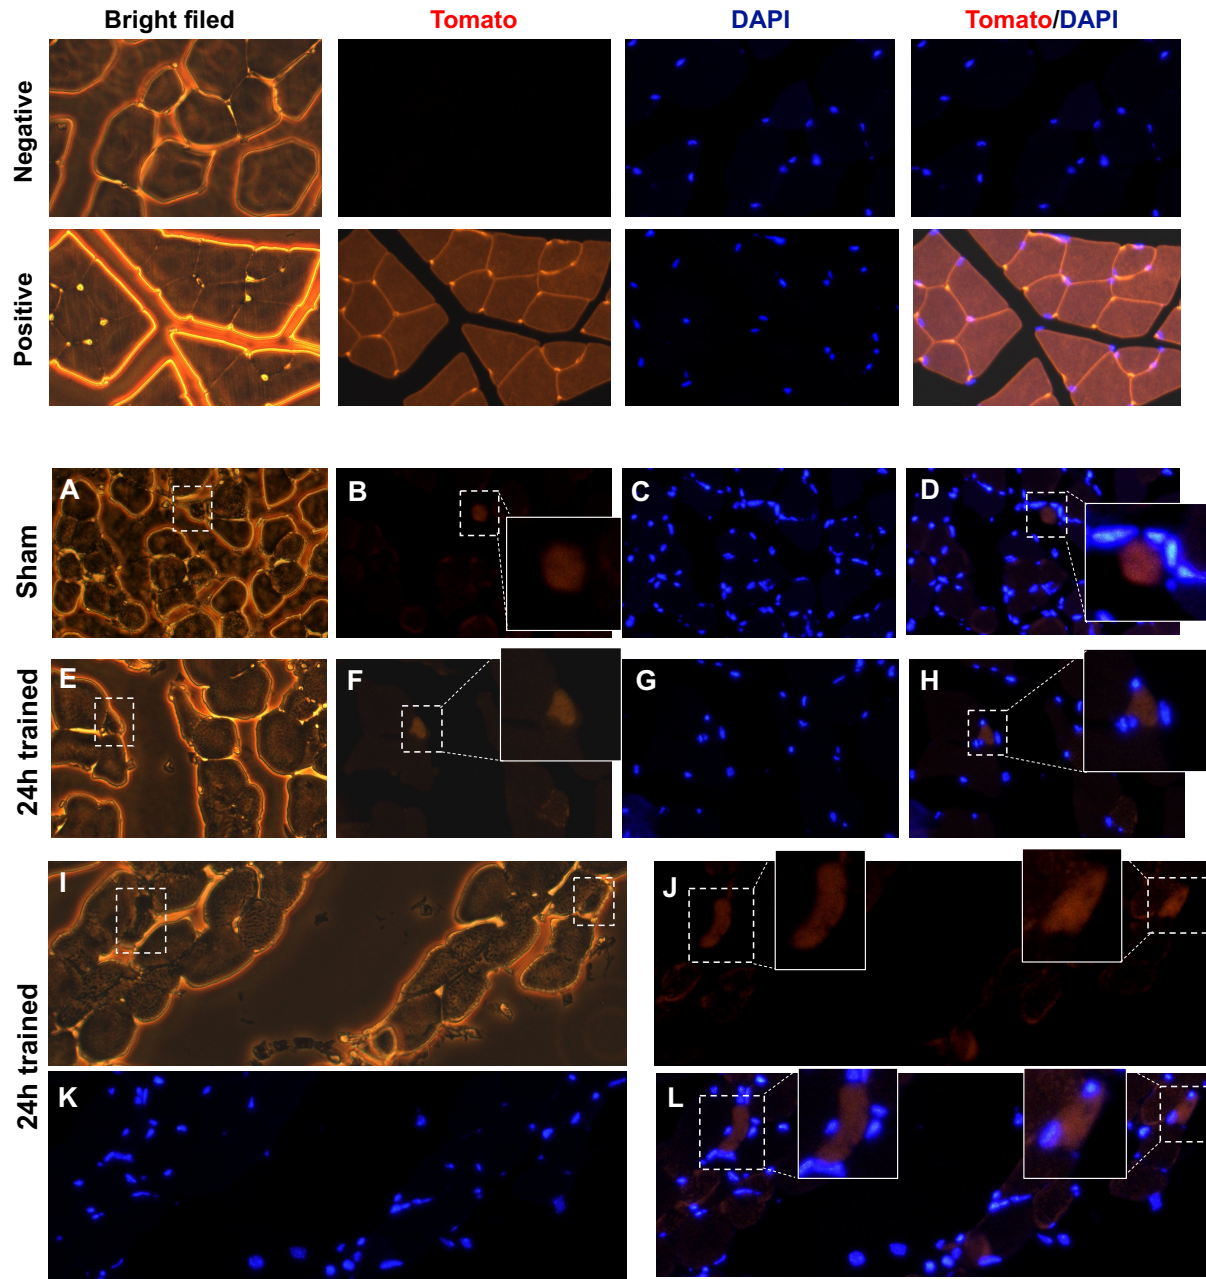

**Figure S2 - Cell tracing after adoptive transfer of tomato donors BM-Mono in recipients' ischemic muscle.** BM-Mono from 24h trained and sham tomato donor mice were injected in wild type recipient mice subjected to hindlimb ischemia. Upper panel demonstrates negative control (calf of wild type recipient) and positive control (calf of tomato donor). Tomato fluorescence (B, F and J) indicates the presence of donors' BM-Mono in the wild type recipient ischemic calf using immunofluorescence microscopy. Images A, E and I represent bright filed, and nuclei were counterstained with DAPI (blue; C, G and K). Tomato/DAPI staining (D, H and L) confirms that the donor cells were found in both, 24h trained and sham ischemic calf of recipient mice. Representative photomicrographs were taken using 20x lenses, and in images B, D, F, H, J and M, the square is 2x magnified.

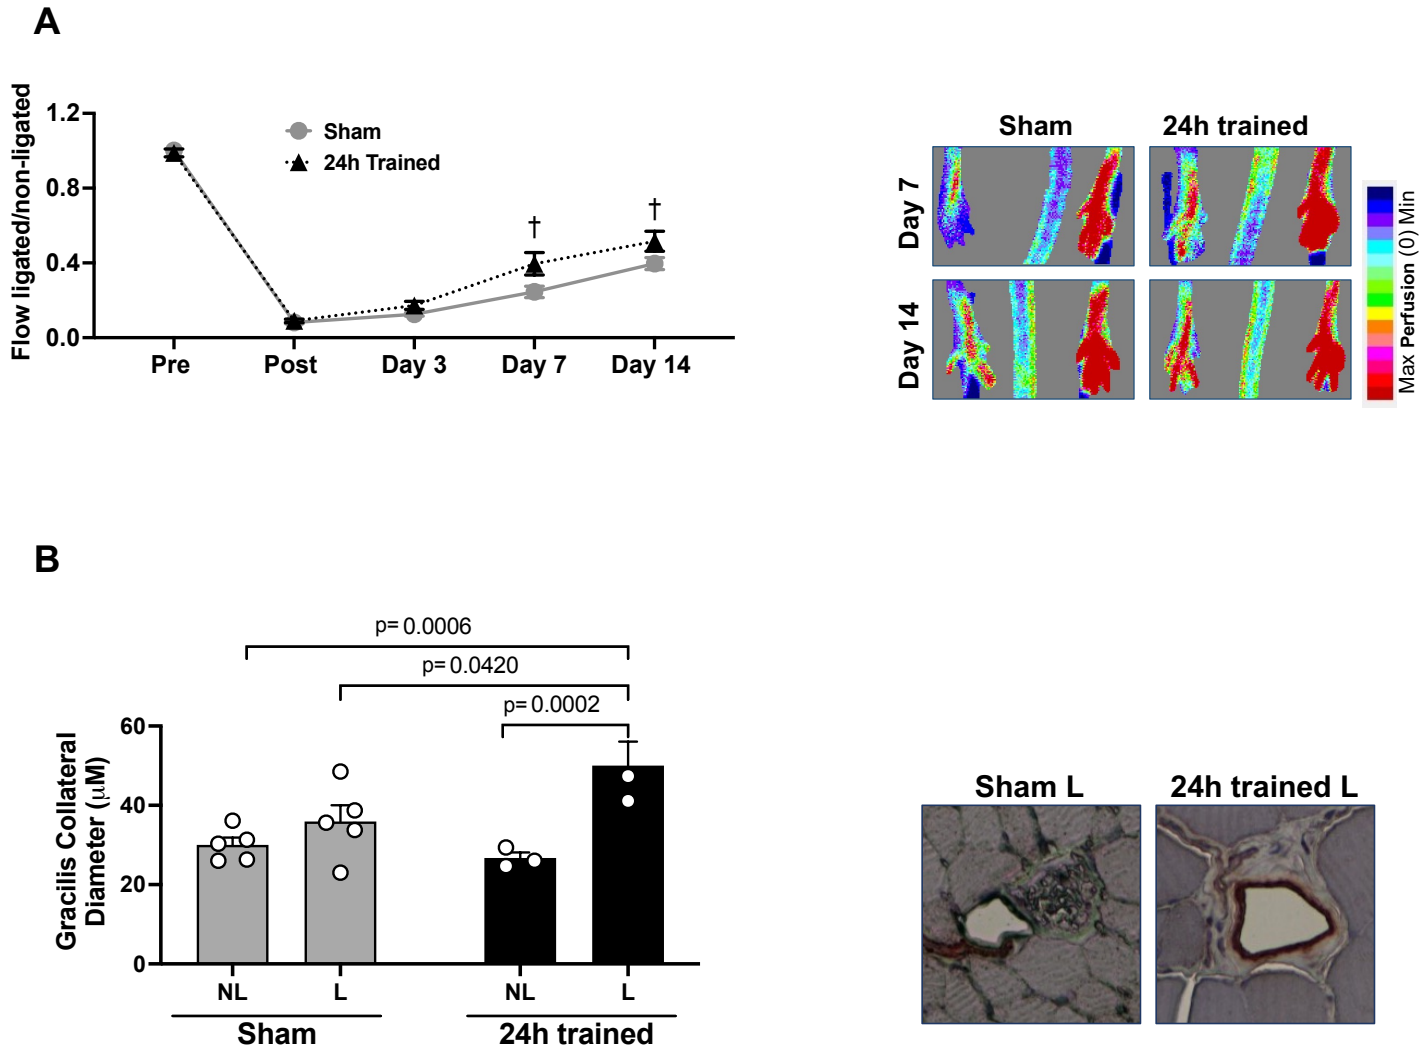

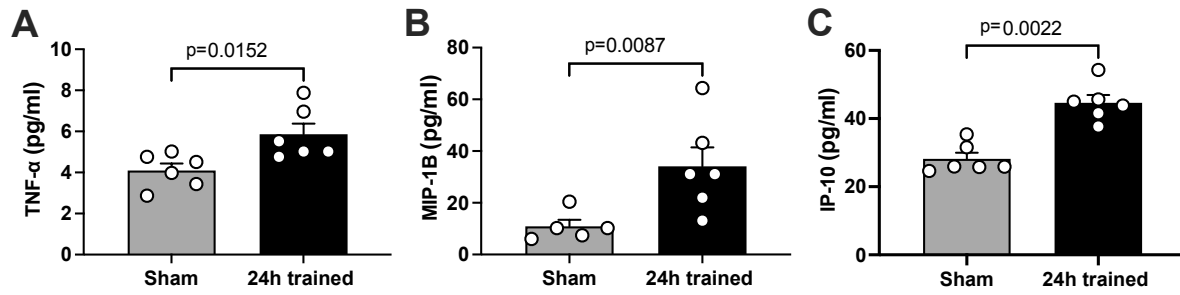

**Figure S4. Circulating pro-inflammatory cytokines/chemokine levels in donor mice.** Plasma samples from 24h trained donor mice demonstrate upregulation of cytokines (A) TNF- $\alpha$  and chemokine (B) MIP-1 $\beta$  and (C) IP-10 (median; 95% CI) by Mann-Whitney test.



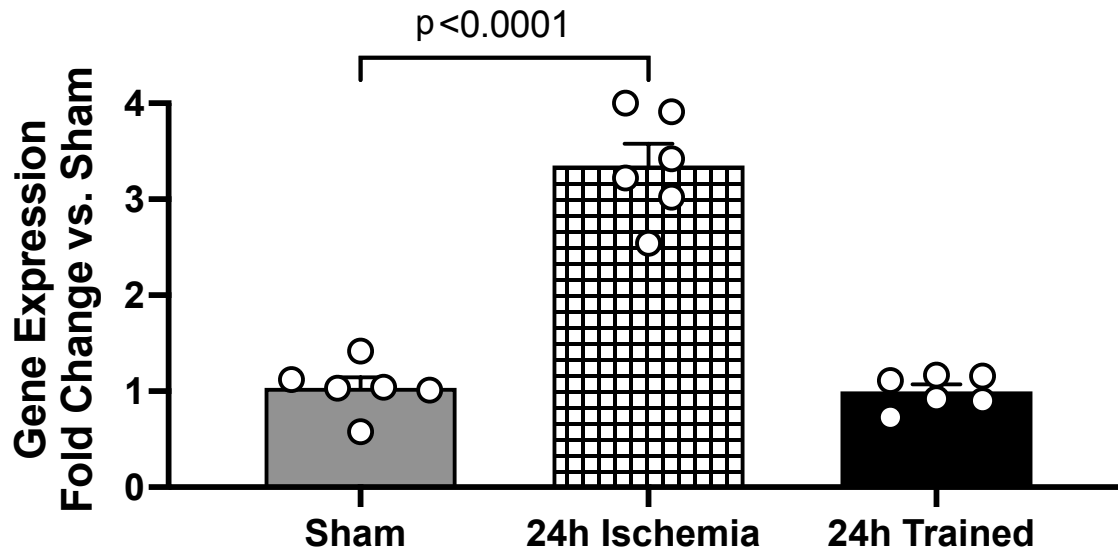

**Figure S5. Gene expression of GLUT-1 in the circulation.** Red blood cells (erythrocytes) were isolated from 24h ischemia (when FA was still occluded after 24h of ligation); 24h trained (when FA was occluded for 24h but already opened for 2 days); and sham. GLUT-1 gene expression was quantified by q-RT-PCR. Erythrocytes from 24h ischemia group demonstrate upregulation of GLUT-1 (more than 3fold), which is known as one of the most important HIF-1 $\alpha$  target genes. The data were compared to sham group using 1-Way ANOVA test followed by Dunnett's multiple comparisons test. Errors bars represent SEM.

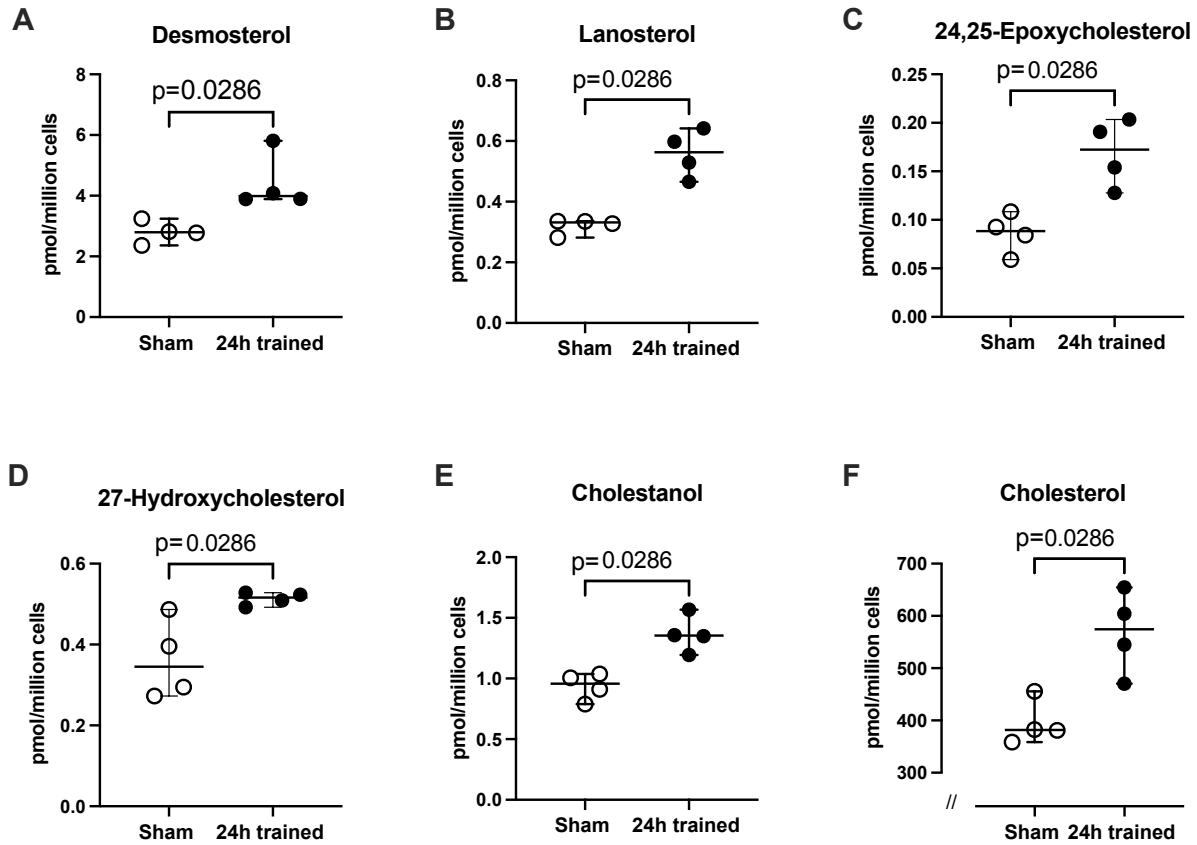

**Figure S6. Sterol analysis of BM-Mono.** Isolated BM-Mono of both legs show up-regulation of (A) desmosterol; (B) Lanosterol; (C) 24,25-Epoxycholesterol; (D) 27-Hydroxycholesterol; (E) Cholestanol, and (F) Cholesterol in the 24h trained compared to Sham (median; 95% CI) by Mann-Whitney test.

**Table S1.** Top monocytes genes regulated by ischemia training

| Gene                                                  | Symbol        | ENSEMBL ID          | p value  | FDR    | Fold Change    |
|-------------------------------------------------------|---------------|---------------------|----------|--------|----------------|
| <b>Apolipoprotein E</b>                               | <b>ApoE</b>   | ENSMUSG00000002985  | 8.06E-09 | 0.0001 | - <b>2.388</b> |
| Family with sequence similarity 71 member A           | Fam71a        | ENSMUSG000000091017 | 3.39E-07 | 0.0017 | 3.275          |
| PNN interacting serine and arginine rich protein      | Pnir          | ENSMUSG000000028248 | 8.19E-07 | 0.0034 | - 1.452        |
| Terminal nucleotidyltransferase 5A                    | Tent5a        | ENSMUSG000000032265 | 1.01E-06 | 0.0040 | - 1.463        |
| Joining chain of multimeric iga and igm               | Jchain        | ENSMUSG000000067149 | 3.33E-06 | 0.0108 | - 2.259        |
| <b>Squalene epoxidase</b>                             | <b>Sqle</b>   | ENSMUSG000000022351 | 4.14E-06 | 0.0120 | - <b>2.221</b> |
| O-linked N-acetylglucosamine (glcnac) transferase     | Ogt           | ENSMUSG000000034160 | 4.90E-06 | 0.0134 | - 1.463        |
| Myristoylated alanine rich protein kinase C substrate | Marcks        | ENSMUSG000000047945 | 8.17E-06 | 0.0205 | - 1.579        |
| Chemokine (C-C motif) ligand 6                        | Ccl6          | ENSMUSG000000018927 | 1.14E-05 | 0.0253 | - 1.662        |
| Adhesion G protein-coupled receptor E4                | Adgre4        | ENSMUSG000000032915 | 1.24E-05 | 0.0264 | - 1.787        |
| BCL3 transcription coactivator                        | Bcl3          | ENSMUSG000000053175 | 1.57E-05 | 0.0321 | - 1.717        |
| Thioredoxin interacting protein                       | Txnip         | ENSMUSG000000038393 | 2.03E-05 | 0.0379 | - 1.774        |
| <b>Lipin 1</b>                                        | <b>Lpin1</b>  | ENSMUSG000000020593 | 2.05E-05 | 0.0379 | - <b>1.809</b> |
| <b>24-dehydrocholesterol reductase</b>                | <b>Dhcr24</b> | ENSMUSG000000034926 | 2.41E-05 | 0.0417 | - <b>2.200</b> |
| Calcium/calmodulin dependent protein kinase I         | Camk1         | ENSMUSG000000030272 | 2.50E-05 | 0.0420 | - 1.607        |

Table shows all genes down-regulated or up-regulated by  $\geq 1.5$ -fold. Genes were considered to be statistically different from sham group with a false discovery rate p-value (FDR)  $\leq 0.05$  determined by applying the Benjamini-Hochberg multiplicity correction method (n=4).
